increase in blood flow, and the development of collateral venous circulations caused by chronic occlusion of the IVC might increase the risk of intraoperative bleeding. Further, this patient had placenta previa, which increased the risk of intraoperative hemorrhage during placental dissection; therefore, simultaneous hysterectomy was required at the time of delivery of the fetus via Caesarean section. Finally, the simultaneous performance of Caesarean section, hysterectomy, radical nephrectomy and IVC thrombectomy is associated with excessive risk of severe bleeding. Therefore, surgical management in this case was divided into two steps. First, the patient underwent Caesarean section and hysterectomy at 26 weeks gestation. Then, 16 days after delivery, when hemodynamics

and hemostasis had improved due to termination of gestation, the patient underwent radical nephrectomy with concomitant IVC thrombectomy.

## Conclusions

To the best of our knowledge, this is the first report to describe a case of RCC with IVC tumor thrombus diagnosed during pregnancy. Careful consideration of the proper timing and type of operation according to the trimester of pregnancy and the level of progression of RCC is required to optimize outcomes for both the mother and the fetus.

## References

- 1 Brenner B, Avivi I: Cancer in pregnancy: the role of thromboprophylaxis. *Thromb Res* 2012;129(suppl 1):S20–S21.
- 2 Bhutta HY, Walsh SR, Tang TY, Walsh CA, Clarke JM: Ovarian vein syndrome: a review. *Int J Surg* 2009;7:516–520.
- 3 Yin L, Zhang D, Teng J, Xu D: Retroperitoneal laparoscopic radical nephrectomy for renal cell carcinoma during pregnancy. *Urol Int* 2013;90:487–489.
- 4 Pertia A, Gagua D, Managadze L, Chkhotua A: Treatment of renal cell carcinoma in pregnancy: simultaneous nephron-sparing surgery and Caesarian section (case report). *Georgian Med News* 2011;201:7–10.
- 5 Royle G, Barry CL, Blacklock H, Lake Y: D-D dimers: a poor correlate of PPIH and subsequent outcomes. *Int J Gynaecol Obstet* 1998; 62:37–42.
- 6 Khochikar MV: Management of urological cancers during pregnancy. *Nat Rev Urol* 2010; 7:195–205.
- 7 Loughlin KR: The management of urological malignancies during pregnancy. *Br J Urol* 1995;76:639–644.
- 8 Casella R, Ferrier C, Giudici G, Dickenmann M, Giannini O, Hosli I, Bachmann A, Sulser T: Surgical management of renal cell carcinoma during the second trimester of pregnancy. *Urol Int* 2006;76:180–181.
- 9 Lawindy SM, Kurian T, Kim T, Mangar D, Armstrong PA, Alsina AE, Sheffield C, Sexton WJ, Spiess PE: Important surgical considerations in the management of renal cell carcinoma (RCC) with inferior vena cava (IVC) tumour thrombus. *BJU Int* 2012;110:926–939.
- 10 Shimada S, Saito H, Arai Y: Pulmonary embolism caused by spontaneous migration of tumor thrombus of renal cell carcinoma: a report of two cases. *Int J Urol* 2012;19:277–278.

## Corrigendum

Please be informed that the author Tamara Naumovic wishes to be excluded from the list of authors of the following paper published in this journal:

Dragicevic S, et al: Evaluation of health-related quality of life in patients with prostate cancer after treatment with radical retropubic prostatectomy and permanent prostate brachytherapy. *Urol Int* 2010;85:173–179.
